# Supplementary material for: Insights from the topographic characteristics of a large global catalog of rainfall-induced landslide event inventories
Source: Copernicus journal article supplement (doi:10.5194/nhess-22-1129-2022), 2022-04-01
Supplement: Supplementary file 2 [file nhess-22-1129-2022-supplement.zip]

Archive with 3 entries (3 files):
- Updated_inventories.zip
- Supplementary Material_inventory_analysis_final.pdf
- nhess-22-1129-2022-supplement-title-page.pdf
