# Supplementary material for: Insights from the topographic characteristics of a large global catalog of rainfall-induced landslide event inventories
Source: Copernicus journal article supplement (doi:10.5194/nhess-22-1129-2022), 2022-04-01
Supplement: Supplementary file 2 [file nhess-22-1129-2022-supplement.zip › nhess-22-1129-2022-supplement-title-page.pdf]

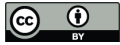

*Supplement of*

**Insights from the topographic characteristics of a large global catalog of rainfall-induced landslide event inventories**

**Robert Emberson et al.**

*Correspondence to:* Robert Emberson ([robert.a.emberson@nasa.gov](mailto:robert.a.emberson@nasa.gov))

- [nhess-22-1129-2022-supplement-title-page.pdf](#)
- [Supplementary Material\\_inventory\\_analysis\\_final.pdf](#)
- [Updated\\_inventories.zip](#)

The copyright of individual parts of the supplement might differ from the article licence.
